# Supplementary material
Source: PubMed Central journal article supplement (PMC6181132)
Supplement: NIHMS1504861-supplement-9.pdf [file NIHMS1504861-supplement-9.pdf]

## Supplementary Table 7

| Symbol       | # of targets<br>in Up-regulated DPP | Enrichment P |
|--------------|-------------------------------------|--------------|
| CDK1         | 48                                  | < 0.00001    |
| <b>CDK2</b>  | 49                                  | < 0.00001    |
| GSK3B        | 41                                  | < 0.00001    |
| <b>CHEK1</b> | 21                                  | < 0.00001    |
| MAPK14       | 30                                  | < 0.00001    |
| MAPK10       | 14                                  | < 0.00001    |
| MAPK8        | 17                                  | < 0.00001    |
| AURKB        | 11                                  | < 0.00001    |
| PRKCB        | 15                                  | < 0.00001    |
| MAPK1        | 16                                  | < 0.00001    |
| ATM          | 12                                  | < 0.00001    |
| PRKDC        | 13                                  | < 0.00001    |
| MAPK9        | 11                                  | < 0.00001    |
| CHEK2        | 7                                   | < 0.00001    |
| CSNK2A2      | 13                                  | < 0.00001    |
| AKT1         | 14                                  | < 0.00001    |
| CSNK1E       | 10                                  | 0.00001      |
| SGK1         | 7                                   | 0.00001      |
| RPS6KA3      | 13                                  | 0.00004      |
| TYK2         | 5                                   | 0.00007      |
| CSNK2A1      | 12                                  | 0.00012      |
| <b>ERBB2</b> | 7                                   | 0.00040      |
| PRKCZ        | 7                                   | 0.00060      |
| PRKCA        | 14                                  | 0.00063      |
| CLK2         | 5                                   | 0.00071      |
| CDK5         | 7                                   | 0.00076      |
| PLK1         | 6                                   | 0.00099      |
